# Supplementary material for: Association Analysis of Noncoding Variants in Neuroligins 3 and 4X Genes with Autism Spectrum Disorder in an Italian Cohort
Source: PubMed Central journal article supplement (PMC5085789; doi:10.3390/ijms17101765), 2016-10-22
Supplement: ijms-17-01765-s001.pdf [file ijms-17-01765-s001.pdf]

## Supplementary Materials: Association Analysis of Non Coding Variants in Neuroligins 3 and 4X Genes with Autism Spectrum Disorder in an Italian Cohort

Martina Landini, Ivan Merelli, M. Elisabetta Raggi, Nadia Galluccio, Francesca Ciceri, Arianna Bonfanti, Serena Camposeo, Angelo Massagli, Laura Villa, Erika Salvi, Daniele Cusi, Massimo Molteni, Luciano Milanese, Anna Marabotti and Alessandra Mezzelani

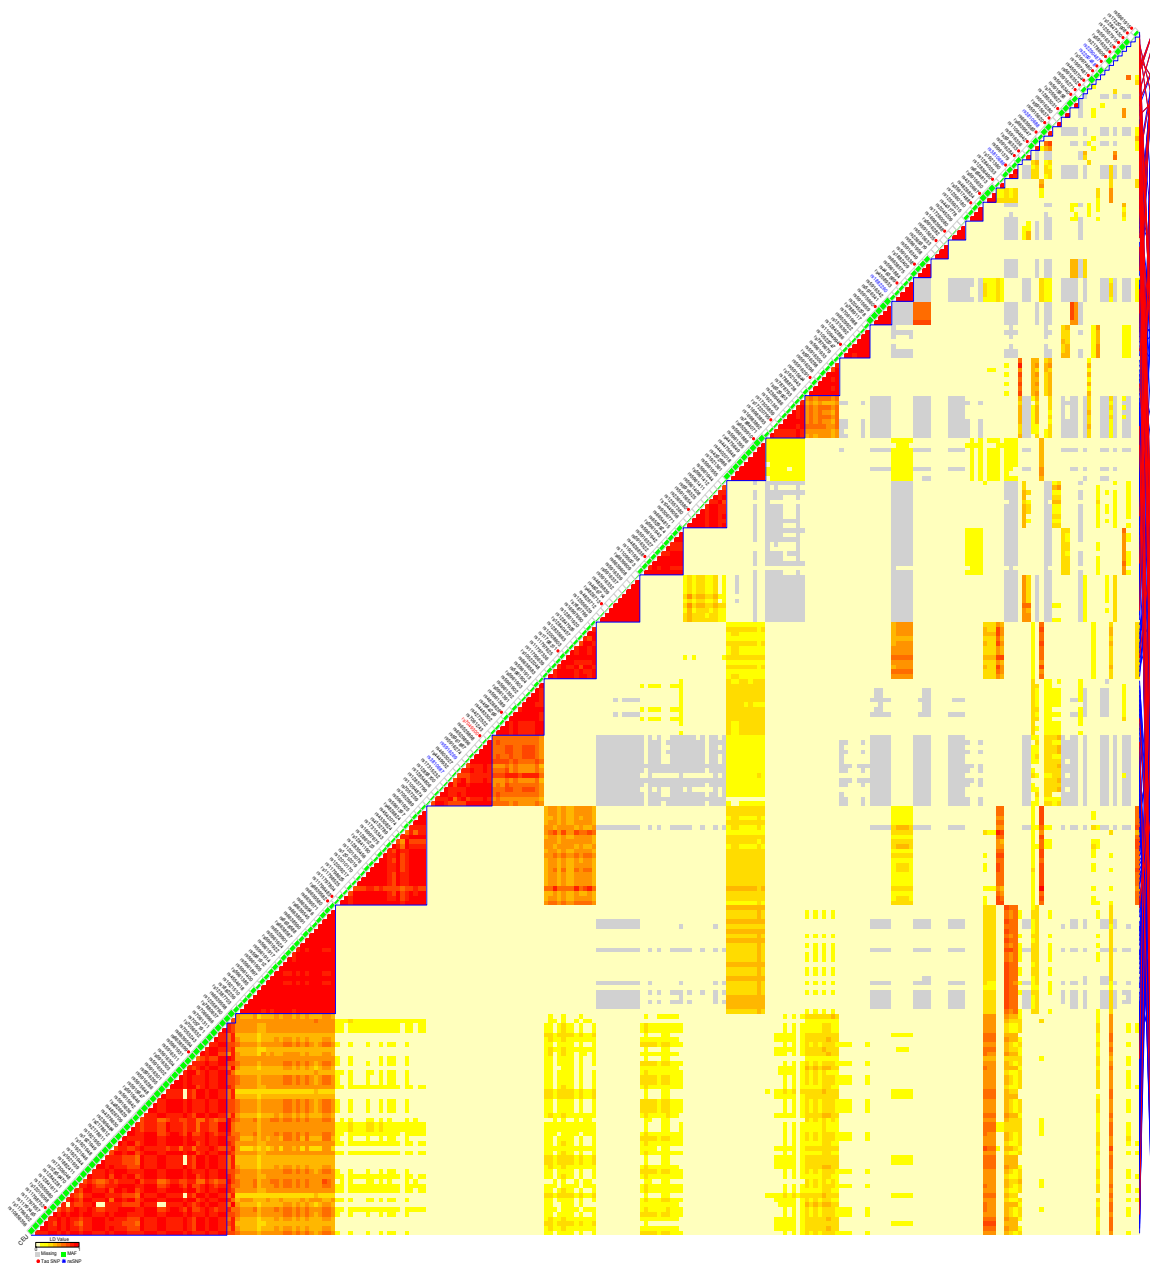

**Figure S1.** Represents the LD scores, derived from the 1000 Genome Project EUR population, of all the SNPs located in NLGN4X including those selected for our analyses and the related TAG SNPs.

**Table S1.** Hardy-Weinberg equilibrium considering the EUR control population.

| SNP       | Test  | A1 | A2 | GENO      | Observed Heterozygosity | Expected Heterozygosity | p-Value |
|-----------|-------|----|----|-----------|-------------------------|-------------------------|---------|
| rs6638575 | ALL   | A  | G  | 22/93/123 | 0.3908                  | 0.41                    | 0.5264  |
| rs6638575 | AFF   | A  | G  | 7/13/17   | 0.3514                  | 0.4635                  | 0.1598  |
| rs6638575 | UNAFF | A  | G  | 15/80/106 | 0.398                   | 0.3975                  | 1       |
| rs3810688 | ALL   | T  | C  | 21/84/133 | 0.3529                  | 0.3893                  | 0.1812  |
| rs3810688 | AFF   | T  | C  | 03/07/27  | 0.1892                  | 0.2896                  | 0.05608 |
| rs3810688 | UNAFF | T  | C  | 18/77/106 | 0.3831                  | 0.4042                  | 0.4852  |
| rs3810687 | ALL   | T  | G  | 6/41/191  | 0.1723                  | 0.1979                  | 0.05161 |
| rs3810687 | AFF   | T  | G  | 02/07/28  | 0.1892                  | 0.2531                  | 0.1544  |
| rs3810687 | UNAFF | T  | G  | 4/34/163  | 0.1692                  | 0.1871                  | 0.2417  |
| rs3810686 | ALL   | T  | C  | 56/103/79 | 0.4328                  | 0.4953                  | 0.05063 |
| rs3810686 | AFF   | T  | C  | 10/14/13  | 0.3784                  | 0.4967                  | 0.185   |
| rs3810686 | UNAFF | T  | C  | 46/89/66  | 0.4428                  | 0.495                   | 0.1537  |
| rs5916269 | ALL   | A  | G  | 6/41/191  | 0.1723                  | 0.1979                  | 0.05161 |
| rs5916269 | AFF   | A  | G  | 02/07/28  | 0.1892                  | 0.2531                  | 0.1544  |
| rs5916269 | UNAFF | A  | G  | 4/34/163  | 0.1692                  | 0.1871                  | 0.2417  |
| rs1882260 | ALL   | C  | T  | 22/92/124 | 0.3866                  | 0.4082                  | 0.4278  |
| rs1882260 | AFF   | C  | T  | 08/12/17  | 0.3243                  | 0.4704                  | 0.07819 |
| rs1882260 | UNAFF | C  | T  | 14/80/107 | 0.398                   | 0.393                   | 1       |

Genotype counts and Hardy-Weinberg test statistics for each SNP considering the EUR control population. ALL = all subjects; AFF = affected; UNAFF = unaffected.

**Table S2.** Hardy-Weinberg equilibrium considering the ITA control population.

| SNP       | Test  | A1 | A2 | GENO       | Observed Heterozygosity | Expected Heterozygosity | p-Value |
|-----------|-------|----|----|------------|-------------------------|-------------------------|---------|
| rs6638575 | ALL   | A  | G  | 62/188/222 | 0.3983                  | 0.4425                  | 0.0294  |
| rs6638575 | AFF   | A  | G  | 7/13/17    | 0.3514                  | 0.4635                  | 0.1598  |
| rs6638575 | UNAFF | A  | G  | 55/175/205 | 0.4023                  | 0.4405                  | 0.08112 |
| rs3810688 | ALL   | T  | C  | 25/178/269 | 0.3771                  | 0.3664                  | 0.6153  |
| rs3810688 | AFF   | T  | C  | 03/07/27   | 0.1892                  | 0.2896                  | 0.05608 |
| rs3810688 | UNAFF | T  | C  | 22/171/242 | 0.3931                  | 0.3721                  | 0.3019  |
| rs3810687 | ALL   | T  | G  | 10/100/362 | 0.2119                  | 0.2219                  | 0.3019  |
| rs3810687 | AFF   | T  | G  | 02/07/28   | 0.1892                  | 0.2531                  | 0.1544  |
| rs3810687 | UNAFF | T  | G  | 8/93/334   | 0.2138                  | 0.2192                  | 0.6596  |
| rs3810686 | ALL   | T  | C  | 84/232/156 | 0.4915                  | 0.4884                  | 0.9251  |
| rs3810686 | AFF   | T  | C  | 10/14/13   | 0.3784                  | 0.4967                  | 0.185   |
| rs3810686 | UNAFF | T  | C  | 74/218/143 | 0.5011                  | 0.4874                  | 0.6228  |
| rs5916269 | ALL   | A  | G  | 11/100/361 | 0.2119                  | 0.2251                  | 0.2168  |
| rs5916269 | AFF   | A  | G  | 02/07/28   | 0.1892                  | 0.2531                  | 0.1544  |
| rs5916269 | UNAFF | A  | G  | 9/93/333   | 0.2138                  | 0.2226                  | 0.3893  |
| rs1882260 | ALL   | C  | T  | 64/189/219 | 0.4004                  | 0.4461                  | 0.05996 |
| rs1882260 | AFF   | C  | T  | 08/12/17   | 0.3243                  | 0.4704                  | 0.07819 |
| rs1882260 | UNAFF | C  | T  | 56/177/202 | 0.4069                  | 0.4437                  | 0.08437 |

Genotype counts and Hardy-Weinberg test statistics for each SNP considering the ITA control population. ALL = all subjects; AFF = affected; UNAFF = unaffected.

**Table S3.** Single locus analysis for male individuals considering all the SNPs genotyped in *NLGN3* and *NLGN4X* (EUR control population).

| Gene          | SNP        | BP        | A1 | F_A    | F_U    | P      | OR    |
|---------------|------------|-----------|----|--------|--------|--------|-------|
| <i>NLGN3</i>  | rs11795613 | 8,684,936 | G  | 0.5152 | 0.4775 | 0.1862 | 1.163 |
| <i>NLGN3</i>  | rs4844285  | 8,687,852 | A  | 0.497  | 0.4663 | 0.5699 | 1.131 |
| <i>NLGN3</i>  | rs4844286  | 8,689,182 | T  | 0.5212 | 0.4775 | 0.1188 | 1.191 |
| <i>NLGN4X</i> | rs6638575  | 339,066   | A  | 0.2727 | 0.2472 | 0.5898 | 1.142 |
| <i>NLGN4X</i> | rs3810688  | 340,951   | T  | 0.3034 | 0.2364 | 0.0431 | 1.406 |
| <i>NLGN4X</i> | rs3810687  | 341,023   | T  | 0.1273 | 0.118  | 0.793  | 1.09  |
| <i>NLGN4X</i> | rs3810686  | 341,133   | T  | 0.4545 | 0.4382 | 0.7609 | 1.068 |
| <i>NLGN4X</i> | rs5916269  | 341,408   | A  | 0.1273 | 0.118  | 0.793  | 1.09  |
| <i>NLGN4X</i> | rs1882260  | 342,846   | C  | 0.3152 | 0.2584 | 0.2453 | 1.321 |

Single locus analysis for male individuals considering all the SNPs genotyped in *NLGN3* and *NLGN4X*.

**Table S4.** Single locus analysis for female individuals considering all the SNPs genotyped in *NLGN3* and *NLGN4X* (EUR control population).

| Gene          | SNP        | BP        | A1 | F_A    | F_U    | P       | OR     |
|---------------|------------|-----------|----|--------|--------|---------|--------|
| <i>NLGN3</i>  | rs11795613 | 8,684,936 | G  | 0.5135 | 0.4826 | 0.6248  | 1.132  |
| <i>NLGN3</i>  | rs4844285  | 8,687,852 | A  | 0.473  | 0.4776 | 0.9415  | 0.9816 |
| <i>NLGN3</i>  | rs4844286  | 8,689,182 | T  | 0.4865 | 0.4975 | 0.8616  | 0.9568 |
| <i>NLGN4X</i> | rs6638575  | 339,066   | A  | 0.3649 | 0.2736 | 0.1112  | 1.525  |
| <i>NLGN4X</i> | rs3810688  | 340,951   | T  | 0.2811 | 0.1757 | 0.05889 | 1.834  |
| <i>NLGN4X</i> | rs3810687  | 341,023   | T  | 0.1486 | 0.1045 | 0.267   | 1.497  |
| <i>NLGN4X</i> | rs3810686  | 341,133   | T  | 0.4595 | 0.4502 | 0.8837  | 1.038  |
| <i>NLGN4X</i> | rs5916269  | 341,408   | A  | 0.1486 | 0.1045 | 0.267   | 1.497  |
| <i>NLGN4X</i> | rs1882260  | 342,846   | C  | 0.3784 | 0.2687 | 0.05485 | 1.657  |

Single locus analysis for female individuals considering all the SNPs genotyped in *NLGN3* and *NLGN4X*.

**Table S5.** SNP genotyping.

| Gene   | SNPs       | Alleles | Primers                                                                         | Amplification                                                                                       | HRMA (°C) |
|--------|------------|---------|---------------------------------------------------------------------------------|-----------------------------------------------------------------------------------------------------|-----------|
| NLGN3  | rs4844285  | (A/G)   | Forward: 5'TCTGAGGTTGGTAGGGTACAGT3'<br>Reverse: 5'CCTGCAGGTTTAAGAGACCTT3'       | Hold: 98 °C × 15"; Cycling (×35):<br>98 °C × 3"/66 °C × 5"/72 × 7"<br>Touchdown: 0.5 °C × 20 cycles | 74–85     |
|        | rs11795613 | (A/G)   | Forward: 5'GGCAGTGGATCATCTGTGGGA3'<br>Reverse: 5'AAGATGGTCTGGGAGGGCAA3'         | Hold: 98 °C × 15"; Cycling (×40):<br>98 °C × 2"/70 °C × 5"/72 °C × 8"                               | 79–90     |
|        | rs4844286  | (T/G)   | Forward: 5'AGCAACCCAGGAACACITTC3'<br>Reverse: 5'TTCCCCAGGAAACCCITTC3'           | Hold: 98 °C × 10"; Cycling (×40):<br>98 °C × 2"/60 °C × 7"/72 °C × 8"                               | 75–86     |
| NLGN4X | rs6638575  | (A/G)   | Forward: 5'TGATTCTCCTTCTACCTGTGACC3'<br>Reverse: 5'AGACACCCAGAAACAAGTCA3'       | Hold: 98 °C × 10"; Cycling (×40):<br>98 °C × 5"/59 °C × 20"/72 °C × 15"                             | 70–90     |
|        | rs3810686  | (T/C)   | Forward: 5'GCAGACCCCTTATCGTTGGTG3'<br>Reverse: 5'GCCTTGAAATGGTGATGCCTA3'        | Hold: 98 °C × 10"; Cycling (×40):<br>98 °C × 5"/58 °C × 20"/72 °C × 15"                             | 70–90     |
|        | rs1882260  | (C/T)   | Forward: 5'CAACCTTTGATTACTGAATCCCTAC3'<br>Reverse: 5'CCCCAAATCCTATTGCTTATCTTG3' | Hold: 98 °C × 10"; Cycling (×40):<br>98 °C × 5"/59 °C × 20"/72 °C × 15"                             | 70–90     |
|        | rs3810688  | (T/C)   | Forward: 5'CTATCCCTCTGCCCTACCCG3'<br>Reverse: 5'CCAACGATAAGGGTCTGCCG3'          | Hold: 98 °C × 10"; Cycling (×40):<br>98 °C × 5"/58 °C × 20"/72 °C × 15"                             | 75–86     |
|        | rs5916269  | (A/G)   | Forward: 5'TTAAAAGAATGGACTGTGACGCG3'<br>Reverse: 5'TAGTTCAGGCTGGCAAAACAC3'      | Hold: 98 °C × 10"; Cycling (×40):<br>98 °C × 5"/58 °C × 20"/72 °C × 15"                             | 70–90     |
|        | rs3810687  | (T/G)   | Forward: 5'GCAAAAAGGCAGTCATCCCA3'<br>Reverse: 5'TTCTCACATTTCACAGGGTCAGA3'       | Hold: 98 °C × 10"; Cycling (×40):<br>98 °C × 5"/58 °C × 20"/72 °C × 15"                             | 70–85     |

Primers and HRMA protocols for all the SNPs analyzed in this study. HRMA (°C): melting temperature range for High Resolution Melting Analysis.
